# Supplementary material for: Nanostructured micro/mesoporous graphene: removal performance of volatile organic compounds
Source: Royal Society of Chemistry journal article supplement (doi:10.1039/d2ra01275h), 2022-01-01
Supplement: d2ra01275h1.pdf [file d2ra01275h1.pdf]

## Supplementary information

# Nanostructured micro/mesoporous graphene: Removal performance of volatile organic compounds

Thi To Nguyen Vo,<sup>a</sup> Sun Taek Lim,<sup>ac</sup> Ji Hoon Kim,<sup>ab</sup> Gyu Hyeon Shim,<sup>ac</sup> Koung Moon Kim,<sup>ac</sup> Boyeon Kweon,<sup>a</sup> Miyeon Kim,<sup>d</sup> Chang Yeon Lee,<sup>d</sup> and Ho Seon Ahn<sup>ace\*</sup>

<sup>a</sup> Department of Mechanical Engineering, Incheon National University, Incheon, Republic of Korea.

<sup>b</sup> Research Institute of Basic Sciences, Incheon National University, Incheon, Republic of Korea.

<sup>c</sup> Nuclear Safety Research Institute, Incheon National University, Incheon, Republic of Korea.

<sup>d</sup> Department of Energy and Chemical Engineering, Incheon National University, Incheon, Republic of Korea.

<sup>e</sup> AHN Materials INC, Incheon, Republic of Korea.

***RSC Advances***

**\*Please address all correspondence to**

Professor, Ho Seon Ahn

Department of Mechanical Engineering

Incheon National University

Incheon, 22012, Republic of Korea

E-mail: hsahn@inu.ac.kr

### Preparation of the pre-packed TEGOs filter

A pre-packed filter was prepared in an enclosed polypropylene filter loaded with 150 mg TEGOs. The size of the pre-packed TEGOs should match the diameter of the test loop, ensuring that the contact surface of the adsorbent with the adsorbate is sufficient.

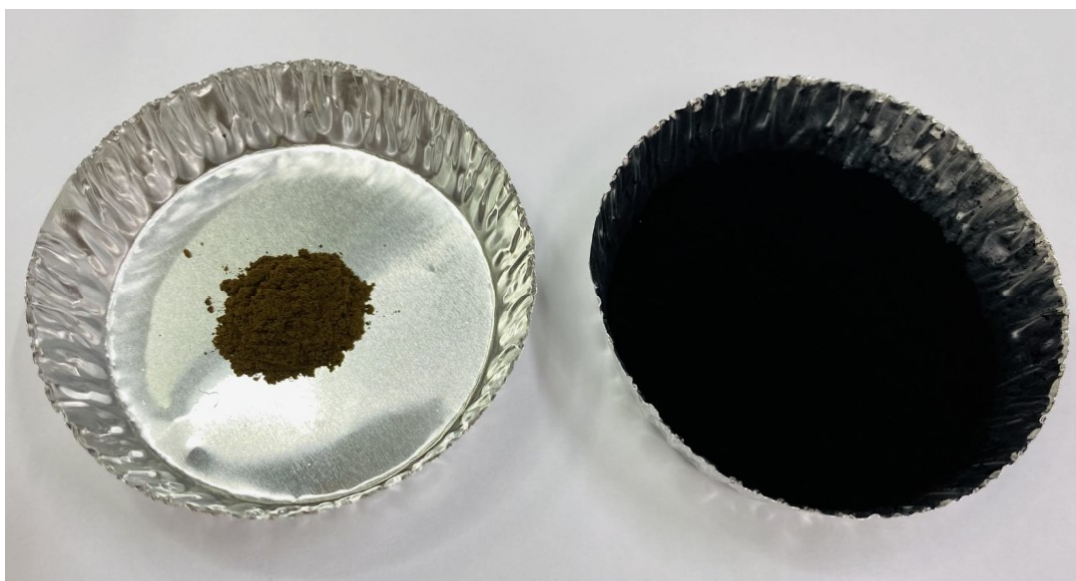

Figure S1. The volumetric expansion of TEGO compared with GO with the same weight of 0.1 g. Graphene planes split after thermal treatment, and the space between the layers widens as the temperature rises. This indicates volumetric expansion as well as an increase in the specific surface area of the TEGO.

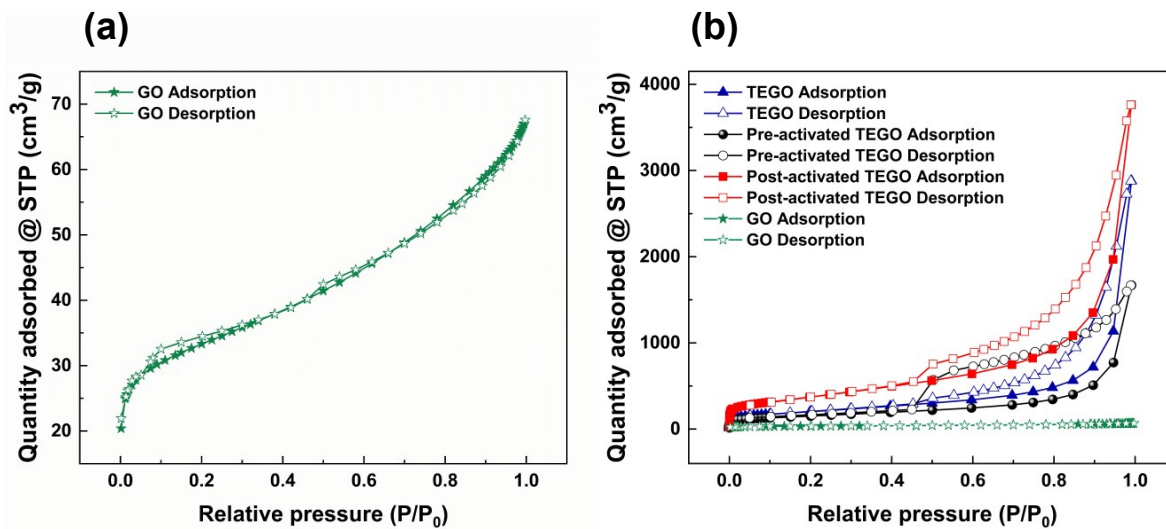

Figure S2. The nitrogen adsorption-desorption isotherm of GO (a) and graphene-based adsorbents (b).

Physical adsorption depends mostly on their specific surface area and pore structure in terms of porous adsorbents. However, there is low SSA on the GO surface characteristics and practically no porosity. Thus, we included the surface characteristics of GO in Table S1 in order to compare the adsorbents of TEGOs and their nitrogen adsorption-desorption isotherm as given in Figure S2.

### Pore characteristic of graphene-based materials

Table S1. Surface parameters of as-prepared adsorbents

| Adsorbent           | $S_{\text{BET}}$<br>(m <sup>2</sup> /g) | $V_p$<br>(cm <sup>3</sup> /g) | Average pore size<br>(nm) |
|---------------------|-----------------------------------------|-------------------------------|---------------------------|
| GO                  | 113.41                                  | 0.10                          | 3.62                      |
| TEGO                | 692.44                                  | 2.51                          | 12.86                     |
| Pre-activated TEGO  | 517.87                                  | 2.60                          | 9.97                      |
| Post-activated TEGO | 1261.46                                 | 2.64                          | 9.22                      |
